# Supplementary material for: Translational symmetry in convolutions with localized kernels causes an implicit bias toward high frequency adversarial examples
Source: Frontiers journal article supplement (doi:10.3389/fncom.2024.1387077), 2024-06-20
Supplement: Data_Sheet_1.pdf [file Data_Sheet_1.pdf]

# Translational Symmetry in Convolutions with Localized Kernels Causes an Implicit Bias towards High Frequency Adversarial Examples

Josue O. Caro<sup>1,\*</sup>, Yilong Ju<sup>1,2</sup>, Ryan Pyle<sup>1,2</sup>, Sourav Dey<sup>3</sup>, Wieland Brendel<sup>4</sup>, Fabio Anselmi<sup>1,5,#</sup>, and Ankit B. Patel<sup>1,2,#</sup>

<sup>1</sup>*Department of Neuroscience, Baylor College of Medicine, Houston, 77030, USA.*

<sup>2</sup>*Department of Electrical and Computer Engineering, Rice University, Houston, 77005, USA*

<sup>3</sup>*Manifold AI*

<sup>4</sup>*University of Tübingen, Max Planck Institute for Intelligent Systems, Germany*

<sup>5</sup>*Department of Mathematics, Informatics and Geosciences, University of Trieste, Via Alfonso Valerio 12 Bld H2bis, Trieste, 34127, Italy*

*and Massachusetts Institute of Technology (MIT), 77 Massachusetts Ave, Cambridge, 02139, MA, USA*

† *co-first authors*

# *senior authors*

Correspondence\*:

Josue Ortega Caro

josue.ortegacaro@yale.edu

## 1 SUPPLEMENTARY MATERIAL

### 1.1 Model Architecture

Supplementary Table 1. Model Architectures

| Model Architecture       | # Hidden Layers | Nonlinearity | Channels |
|--------------------------|-----------------|--------------|----------|
| Fully Connected          | 1,3             | None, ReLU   | 3072     |
| Local Kernel Convolution | 1,3             | None, ReLU   | 32       |
| Full Kernel Convolution  | 1,3             | None, ReLU   | 32       |
| Locally Connected        | 1,3             | None, ReLU   | 32       |

**Supplementary Table 2.** Model Configurations for ImageNet Trained Models. All models were pulled from the timm package.

| Model          | Model Type    | Model timm package name |
|----------------|---------------|-------------------------|
| ResNet50       | Convolutional | resnet50d               |
| EfficientNet   | Convolutional | tf_efficientnet_b0_ns   |
| RepVGG         | Convolutional | repvgg_b3               |
| ConvViT        | Hybrid        | convit_base             |
| ViT-ResNet50   | Hybrid        | vit_large_r50_s32_224   |
| Coat           | Hybrid        | coat_lite_small         |
| ResMLP (36)    | MLP           | resmlp_36_distilled_224 |
| gMixer         | MLP           | gmixer_24_224           |
| MLPMixer Large | MLP           | mixer_b16_224           |
| ViT (8)        | ViT           | vit_base_patch8_224     |
| ViT (16)       | ViT           | vit_base_patch16_224    |
| ViT (32)       | ViT           | vit_base_patch32_224    |

All ImageNet models were pull from the timm package. Furthermore, all models were trained with similar data augmentations, and adversarial attack evaluation was done with default preprocessing from *model.default\_cfg*.

## 1.2 Model Performance

**Supplementary Table 3.** Test Accuracy for all models trained on CIFAR-10, CIFAR100, MNIST, FashionMNIST, SVHN.

| Models                               | Test Accuracy (%) |       |      |         |          |
|--------------------------------------|-------------------|-------|------|---------|----------|
|                                      | FashionMNIST      | MNIST | SVHN | cifar10 | cifar100 |
| Fully Connected                      | 86.9              | 92.0  | 26.5 | 39.6    | 15.8     |
| Full Kernel Convolution              | 86.6              | 91.0  | 28.7 | 40.5    | 17.7     |
| Locally Connected                    | 86.4              | 92.0  | 28.5 | 40.7    | 18.3     |
| Local Kernel Convolution             | 86.4              | 92.0  | 28.2 | 40.2    | 16.1     |
| Deep Full Kernel Convolution         | 86.5              | 91.8  | 26.0 | 41.7    | 18.9     |
| Deep Fully Connected                 | 86.7              | 92.1  | 23.8 | 39.2    | 14.7     |
| Deep Locally Connected               | 84.1              | 92.0  | 29.0 | 41.8    | 18.8     |
| Deep Local Kernel Convolution        | 86.1              | 92.0  | 27.7 | 39.9    | 14.9     |
| Fully Connected (ReLU)               | 88.4              | 97.2  | 77.6 | 43.6    | 15.4     |
| Full Kernel Convolution (ReLU)       | 84.8              | 92.8  | 85.9 | 47.7    | 19.2     |
| Locally Connected (ReLU)             | 87.8              | 95.7  | 82.4 | 53.8    | 22.5     |
| Local Kernel Convolution (ReLU)      | 90.5              | 98.0  | 83.2 | 59.7    | 29.0     |
| Deep Full Kernel Convolution (ReLU)  | 87.8              | 97.4  | 86.3 | 51.7    | 22.2     |
| Deep Fully Connected (ReLU)          | 89.1              | 97.9  | 67.3 | 50.8    | 10.5     |
| Deep Locally Connected (ReLU)        | 86.5              | 96.0  | 86.9 | 57.9    | 18.3     |
| Deep Local Kernel Convolution (ReLU) | 91.7              | 98.8  | 86.7 | 66.0    | 29.6     |

**Supplementary Table 4.** Test Accuracy for all models trained on ImageNet.

| model                   | top1   | top5   |
|-------------------------|--------|--------|
| vit_base_patch8_224     | 85.794 | 97.794 |
| vit_base_patch16_224    | 84.528 | 97.294 |
| vit_large_r50_s32_224   | 84.424 | 97.166 |
| coat_lite_small         | 82.304 | 95.848 |
| convit_base             | 82.286 | 95.938 |
| resmlp_36_distilled_224 | 81.154 | 95.488 |
| vit_base_patch32_224    | 80.722 | 95.566 |
| resnet50d               | 80.522 | 95.162 |
| repvgg_b3               | 80.496 | 95.264 |
| tf_efficientnet_b0_ns   | 78.658 | 94.378 |
| gmixer_24_224           | 78.036 | 93.670 |
| mixer_b16_224           | 76.612 | 92.228 |

### 1.3 Training Hyperparameters

**Supplementary Table 5.** Learning rates for the various models considered on CIFAR-10. All other hyper-parameters were fixed.

| Model Architecture       | Learning Rate | Batch Size | Learning Rate Drop |
|--------------------------|---------------|------------|--------------------|
| Full Kernel Convolution  | .01           | 128        | Yes                |
| Fully Connected          | .01           | 128        | Yes                |
| Locally Connected        | .01           | 128        | Yes                |
| Full Kernel Convolution  | .002          | 128        | Yes                |
| Lokal Kernel Convolution | .002          | 128        | Yes                |

**Supplementary Table 6.** Learning rates for the various models considered on CIFAR-100. All other hyper-parameters were fixed.

| Model Architecture       | Learning Rate | Batch Size | Learning Rate Drop |
|--------------------------|---------------|------------|--------------------|
| Local Kernel Convolution | .01           | 128        | Yes                |
| Fully Connected          | .01           | 128        | Yes                |
| Locally Connected        | .01           | 128        | Yes                |
| Full Kernel Convolution  | .002          | 128        | Yes                |
| Local Kernel Convolution | .002          | 128        | Yes                |

**Supplementary Table 7.** Learning rates for the various models considered on MNIST. All other hyper-parameters were fixed.

| Model Architecture       | Learning Rate | Batch Size | Learning Rate Drop |
|--------------------------|---------------|------------|--------------------|
| Local Kernel Convolution | .01           | 100        | Yes                |
| Fully Connected          | .01           | 100        | Yes                |
| Locally Connected        | .01           | 100        | Yes                |
| Full Kernel Convolution  | .002          | 100        | Yes                |
| Local Kernel Convolution | .002          | 100        | Yes                |

**Supplementary Table 8.** Learning rates for the various models considered on FashionMNIST. All other hyper-parameters were fixed.

| Model Architecture       | Learning Rate | Batch Size | Learning Rate Drop |
|--------------------------|---------------|------------|--------------------|
| Local Kernel Convolution | .01           | 100        | Yes                |
| Fully Connected          | .01           | 100        | Yes                |
| Locally Connected        | .01           | 100        | Yes                |
| Full Kernel Convolution  | .002          | 100        | Yes                |
| Local Kernel Convolution | .002          | 100        | Yes                |

**Supplementary Table 9.** Learning rates for the various models considered on SVHN. All other hyper-parameters were fixed.

| Model Architecture       | Learning Rate | Batch Size | Learning Rate Drop |
|--------------------------|---------------|------------|--------------------|
| Local Kernel Convolution | .01           | 128        | Yes                |
| Fully Connected          | .01           | 128        | Yes                |
| Locally Connected        | .01           | 128        | Yes                |
| Full Kernel Convolution  | .002          | 128        | Yes                |
| Local Kernel Convolution | .002          | 128        | Yes                |

## 1.4 Adversarial Attack Configurations

**Supplementary Table 10.** Adversarial Attack hyperparameters for CIFAR10, SVHN, CIFAR100, MNIST and FashionMNIST

| Attack                     | Metric     | Learning Rate | Number of Steps | Max Norm, $\epsilon$ |
|----------------------------|------------|---------------|-----------------|----------------------|
| Projected Gradient Descent | $L_\infty$ | 0.1           | 1000            | 8.0/255.0            |
| Projected Gradient Descent | $L_2$      | 0.1           | 1000            | 2.0                  |
| Projected Gradient Descent | $L_1$      | 0.1           | 200             | 0.1                  |
| Brendel-Bethge Attack      | $L_\infty$ | 1e-03         | 1000            | -                    |
| Brendel-Bethge Attack      | $L_2$      | 1e-03         | 1000            | -                    |

**Learning Rates.** All the models adversarial attacks were generated using the configuration above with the Foolbox package ?.

## 2 FORMAL PROOF OF HIGH FREQUENCY BIAS

\*

PROOF. Let us first concentrate on a single convolutional filter  $w_l \in \mathbb{R}^D$ . Given an arbitrary choice of frequency interval  $\Omega := \{-k, \dots, 0, \dots, +k\}$  and space interval  $S := \{-a, \dots, 0, \dots, +a\}$ , we want to prove that reducing the energy fraction in the complementary set  $S^c$  implies that we must increase the energy fraction in the complementary set  $\Omega^c$ . The result follows from a direct application of the Uncertainty Principle for finite-dimensional vector spaces, as shown e.g. in Ghobber-Jaming ?. In particular let  $\hat{w} \in \mathbb{R}^D$  be the coefficients of the Discrete Fourier Transform (DFT) of a convolutional filter  $w \in \mathbb{R}^D$ . From equation 1.2 in ? we have

$$\|w\|_{\ell^2(S^c)} + \|\hat{w}\|_{\ell^2(\Omega^c)} \geq \|w\|_2 C(S, \Omega) \quad (1)$$

where  $C(S, \Omega)$  is constant when the intervals  $S, \Omega$  are fixed. Dividing both sides of the inequality by  $\|w\|_2$  we have

$$\kappa(S^c) + \hat{\kappa}(\Omega^c) \geq \text{const}$$

where  $\kappa(\mathcal{A}) := \|w\|_{\ell^2(\mathcal{A})}/\|w\|_2$  is the spatial energy concentration of  $w$  in the index set  $\mathcal{A}$  and  $\hat{\kappa}(\mathcal{B})$  is the frequency energy concentration of  $\hat{w}$  in the set  $\mathcal{B}$ . Thus increasing the energy concentration in the spatial interval  $S$  will cause a decrease in  $S^c$  and by the inequality above an increase in  $\kappa(\Omega^c)$ . If we let  $\Omega$  be an interval of ‘low’ frequencies, then we conclude there will be an increase in the energy concentration in the ‘high’ frequencies  $\Omega^c$ .

The reasoning above can be extended from a single convolutional filter to the full end-to-end weights vector,  $\beta := \star_{l=1}^{L-1} w_l$ , as follows. Note first that, using the convolution theorem, the Discrete Fourier transform of  $\beta$  is the Hadamard product of the Discrete Fourier transforms of the per-layer weights  $w_l$  i.e.

$$\hat{\beta} = \hat{w}_{L-1} \odot \dots \odot \hat{w}_1.$$

Let us consider the energy in a set of ‘low’ frequencies  $\Omega$ :

$$\hat{\beta}_\Omega = \hat{w}_{L-1,\Omega} \odot \dots \odot \hat{w}_{1,\Omega}.$$

Taking the  $\ell_2$  norm and invoking the inequality  $\|a \odot b\|_2 \leq \|a\|_2 \|b\|_2$  a total of  $L - 1$  times we can then write

$$\kappa(\Omega, \beta) \leq \prod_{l=1}^{L-1} \kappa(\Omega, w_l).$$

Suppose now that, all else equal, we decrease the energy concentration in each spatial domain  $S$  of the per-layer filters  $w_l$ . By the reasoning above this will increase the energy concentration in frequency domain in the interval  $\Omega^c$  i.e. a decrease in  $\kappa(\Omega, w_l)$  for each layer  $l$ . By the last inequality this will decrease  $\kappa(\Omega, \beta)$ , resulting in an increase in the energy concentration in the high frequencies ( $\Omega^c$ ) for  $\beta$ .

**LEMMA 1.** *Concentrating the kernel energy in spatial domain increases the implicit regularization term in the optimization in [Gunasekar]:*

$$\forall a' < a : R_{BWC;a'}(\beta) \geq R_{BWC;a}(\beta)$$

PROOF. Reducing filter size  $K$  will increase energy in high freqs i.e.  $\forall K' < K : \kappa_{high}(\beta; K') > \kappa_{high}(\beta; K)$ . This means that the space-limiting constraints only grow more stringent as we reduce

$K$ , implying that the result of the optimization problem for the implicit regularizer will only increase in cost i.e.  $\forall K' < K : R_{BWC;K'}(\beta) \geq R_{BWC;K}(\beta)$  for any candidate linear predictor  $\beta$ . (Note that this does not refer to the learned features  $\beta^*$  which actually depends on the training data as well). In summary, all else being equal, reducing the kernel size  $K$  causes/induces a bias towards more concentration of energy in higher frequencies in  $\beta$ .

In summary reducing the kernel size causes/induces a bias towards more concentration of energy in higher frequencies in  $\beta$ .
